# Supplementary material for: Synapse alterations precede neuronal damage and storage pathology in a human cerebral organoid model of CLN3-juvenile neuronal ceroid lipofuscinosis
Source: PubMed Central journal article supplement (PMC6937812; doi:10.1186/s40478-019-0871-7), 2019-12-30

Figure S2

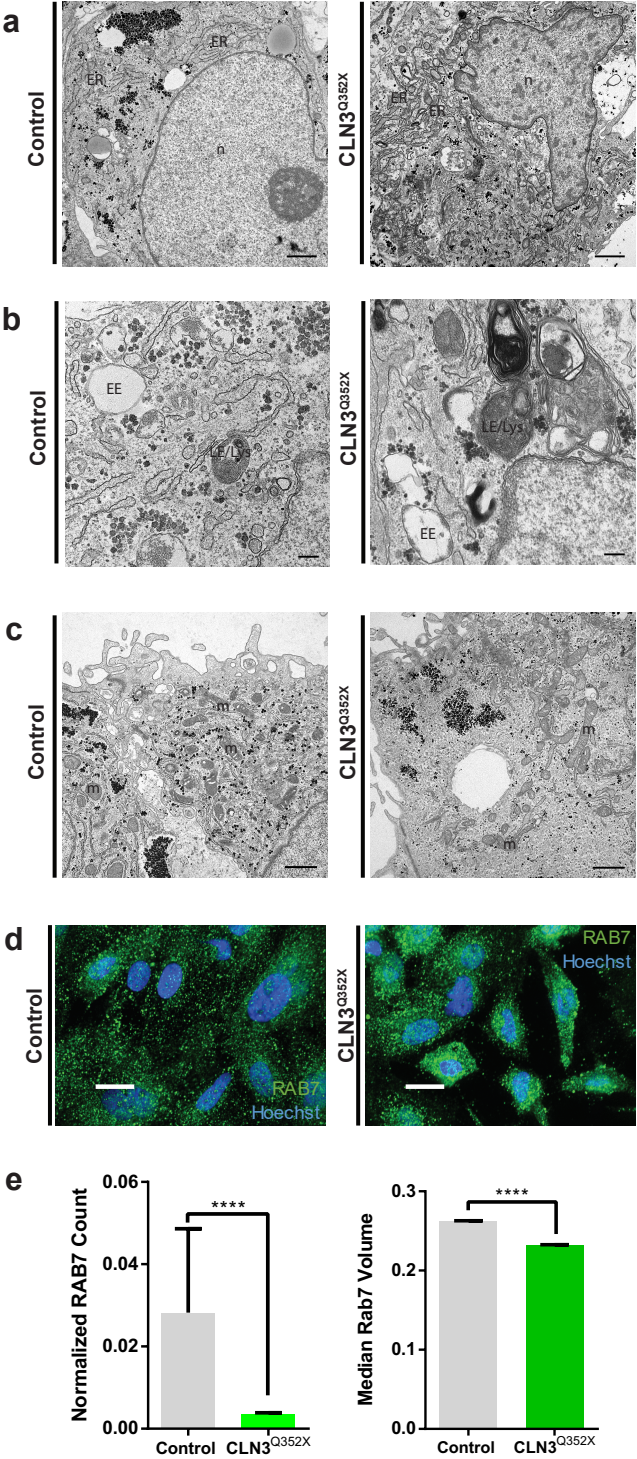

Supplement: 40478_2019_871_MOESM2_ESM.pdf [file 40478_2019_871_MOESM2_ESM.pdf]
